# Supplementary material for: Evaluation of cell wall preparations for proteomics: a new procedure for purifying cell walls from Arabidopsis hypocotyls
Source: Springer Nature journal article supplement (doi:10.1186/1746-4811-2-10), 2006-05-27
Supplement: Additional file 3 [file 1746-4811-2-10-S3.pdf]

### Additional file 3: Bioinformatic analysis of proteins extracted from cell walls of *C. albicans* [20].

Data are from [20]. Proteins were extracted from *C. albicans* cell walls as described in Figure 3. Four successive extractions were performed : step 1 using SDS-DTT, step 2 using NaOH, step 3 using a  $\beta$ -1,3-glucanase and step 4 using an exochitinase. All proteins sequences were analyzed with bioinformatic programs to predict their sub-cellular localization. Proteins for which predictions by different bioinformatic programs are in conflict are classified as "not clear".

| step 1: SDS-DTT extract | Predicted subcellular localization | Accession (a)                                                    | PSORT (b)                          | TargetP (c)               | Predicted signal peptide (d) |
|-------------------------|------------------------------------|------------------------------------------------------------------|------------------------------------|---------------------------|------------------------------|
|                         | outside                            | CA1541<br>Phrp *                                                 | outside (0.370)                    | secretory pathway (0.946) | 1-18                         |
| intracellular           | CA0362                             | cytoplasm (0.650)<br>endoplasmic reticulum (0.910) (C-term HDEL) | other (0.911)                      | 1-29 or 1-32              |                              |
|                         | CA0915                             | mitochondry (0.541)                                              | secretory pathway (0.977)          |                           |                              |
|                         | CA1015                             | nucleus (0.760)                                                  | other (0.694), mitochondry (0.271) |                           |                              |
|                         | CA1230                             | mitochondry (0.360)                                              | other (0.843)                      |                           |                              |
|                         | CA1691                             | endoplasmic reticulum (0.910) (C-term HDEL)                      | other (0.789), mitochondry (0.227) |                           |                              |
|                         | CA1755                             | microbody (0.300)                                                | secretory pathway (0.955)          | 1-23                      |                              |
|                         | CA2474                             | nucleus (0.760)                                                  | other (0.798)                      |                           |                              |
|                         | CA2857                             | nucleus (0.980)                                                  | other (0.842)                      |                           |                              |
|                         | CA3081                             | cytoplasm (0.650)                                                | other (0.885)                      |                           |                              |
|                         | CA3208                             | mitochondry (0.360)                                              | mitochondry (0.663)                |                           |                              |
|                         | CA3483                             | cytoplasm (0.450)                                                | other (0.275), mitochondry (0.299) |                           |                              |
|                         | CA3534                             | cytoplasm (0.450)                                                | other (0.887)                      |                           |                              |
|                         | CA3874                             | cytoplasm (0.450)                                                | other (0.793)                      |                           |                              |
|                         | CA4671                             | mitochondry (0.853)                                              | other (0.834)                      |                           |                              |
|                         | CA4765                             | endoplasmic reticulum (0.550)                                    | mitochondry (0.716)                |                           |                              |
|                         | CA4844                             | mitochondry (0.360)                                              | other (0.704)                      |                           |                              |
|                         | CA4862                             | nucleus (0.600)                                                  | other (0.934)                      |                           |                              |
|                         | CA4959                             | cytoplasm (0.450)                                                | other (0.923)                      |                           |                              |
|                         | CA5135                             | cytoplasm (0.450)                                                | other (0.928)                      |                           |                              |
|                         | CA5180                             | cytoplasm (0.450)                                                | other (0.797)                      |                           |                              |
|                         | CA5892                             | mitochondry (0.471)                                              | mitochondry (0.637)                |                           |                              |
|                         | CA5950                             | microbody (0.800)                                                | other (0.604)                      |                           |                              |
| not predictable         | CA2810                             | not present in the database                                      |                                    |                           |                              |
| step 2: NaOH extract    | outside                            | Hsp150p/Pir2p*                                                   |                                    |                           |                              |
| intracellular           | CA1691                             | mitochondry (0.360)                                              | other (0.789), mitochondry (0.227) |                           |                              |
|                         | CA2474                             | microbody (0.300)                                                | other (0.798)                      |                           |                              |
|                         | CA3483                             | mitochondry (0.360)                                              | other (0.275), mitochondry (0.299) |                           |                              |
|                         | CA3874                             | cytoplasm (0.450)                                                | other (0.793)                      |                           |                              |
|                         | CA4765                             | mitochondry (0.853)                                              | mitochondry (0.716)                |                           |                              |
|                         | CA5180                             | cytoplasm (0.450)                                                | other (0.797)                      |                           |                              |
|                         | CA5892                             | mitochondry (0.471)                                              | mitochondry (0.637)                |                           |                              |

|                                                         |                      |                                                              |                                                                 |                                                                            |
|---------------------------------------------------------|----------------------|--------------------------------------------------------------|-----------------------------------------------------------------|----------------------------------------------------------------------------|
| <b>step 3: <math>\beta</math>-1,3-glucanase extract</b> | <b>outside</b>       | putative $\beta$ -1,3-glucanase*<br>Hsp150p/Pir2p*<br>Phrp * |                                                                 |                                                                            |
|                                                         | <b>intracellular</b> | CA1691<br>CA3874<br>CA5892                                   | mitochondry (0.360)<br>cytoplasm (0.450)<br>mitochondry (0.471) | other (0.789), mitochondry (0.227)<br>other (0.793)<br>mitochondry (0.637) |

|                                     |                      |                                                |                                                                                                           |                                                                                                              |
|-------------------------------------|----------------------|------------------------------------------------|-----------------------------------------------------------------------------------------------------------|--------------------------------------------------------------------------------------------------------------|
| <b>step 4: exochitinase extract</b> | <b>outside</b>       | Hsp150p/Pir2p*<br>Phrp *                       |                                                                                                           |                                                                                                              |
|                                     | <b>intracellular</b> | CA1691<br>CA2474<br>CA3874<br>CA5180<br>CA5892 | mitochondry (0.360)<br>microbody (0.300)<br>cytoplasm (0.450)<br>cytoplasm (0.450)<br>mitochondry (0.471) | other (0.789), mitochondry (0.227)<br>other (0.798)<br>other (0.793)<br>other (0.797)<br>mitochondry (0.637) |

colour code:  proteins found in at least 2 fractions  
 proteins found in at least 2 fractions

\* proteins that failed to be identified to already annotated *C. albicans* proteins

(a) <http://genolist.pasteur.fr/CandidaDB/>

(b) PSORT : <http://psort.nibb.ac.jp/form.html> [29]

(b) TargetP: <http://www.cbs.dtu.dk/services/TargetP/> [30]

(d) Two sizes are indicated when different signal peptides are predicted by PSORT and TargetP. The first one is predicted with PSORT.
